# Supplementary material for: Fasting and Feeding Signals Control the Oscillatory Expression of Angptl8 to Modulate Lipid Metabolism
Source: PubMed Central journal article supplement (PMC5109406; doi:10.1038/srep36926), 2016-11-15
Supplement: srep36926-s1.pdf [file srep36926-s1.pdf]

**Fasting and Feeding Signals Control the Oscillatory Expression of  
*Angptl8* to Modulate Lipid Metabolism**

Fabin Dang<sup>1</sup>, Rong Wu<sup>1</sup>, Pengfei Wang<sup>1</sup>, Yuting Wu<sup>1</sup>, Md. Shofiul Azam<sup>1</sup>, Qian Xu<sup>2</sup>,  
Yaqiong Chen<sup>1</sup> and Yi Liu<sup>1\*</sup>

<sup>1</sup> Key Laboratory of Nutrition and Metabolism, Institute for Nutritional Sciences,  
Shanghai Institutes for Biological Sciences, University of Chinese Academy of  
Sciences, Chinese Academy of Sciences, 320 Yueyang Road Shanghai, 200031,  
China

<sup>2</sup> Department of Endocrinology, The First Affiliated Hospital of Harbin Medical  
University, No. 23 Youzheng Street, NanGang District, Harbin, 150001, China

\*To whom correspondence should be addressed:

Yi Liu

liuyi@sibs.ac.cn

Phone: 086-21-54920762

FAX: 086-21-54920291

**Table 1. Primers used for cloning**

|                               |                                                           |
|-------------------------------|-----------------------------------------------------------|
| <i>Angptl8-P3K-F</i>          | CCGCTCGAGTGGCAGGCAGAGAGGACTGACTC                          |
| <i>Angptl8-P3K-R</i>          | CCCAAGCTTGTTCGTGGGTGTGGTTCCC                              |
| <i>Angptl8-P2K-F</i>          | CCGCTCGAGGTCACCTGACTGACCGGCAA                             |
| <i>Angptl8-P2K-R</i>          | CCCAAGCTTGTTCGTGGGTGTGGTTCCC                              |
| <i>Angptl8-P1.8K-F</i>        | CCGCTCGAGCGGAGGACCCTTTAGAGGGCTG                           |
| <i>Angptl8-P1.8K-R</i>        | CCCAAGCTTGTTCGTGGGTGTGGTTCCC                              |
| <i>Angptl8-P1.6K-F</i>        | CCGCTCGAGCATCCTGGTCTACATAGCAAG                            |
| <i>Angptl8-P1.6K-R</i>        | CCCAAGCTTGTTCGTGGGTGTGGTTCCC                              |
| <i>Angptl8-P1.4K-F</i>        | CCGCTCGAGCACACTAGGCAAGTACTCTACC                           |
| <i>Angptl8-P1.4K-R</i>        | CCCAAGCTTGTTCGTGGGTGTGGTTCCC                              |
| <i>Angptl8-P1.2K-F</i>        | CCGCTCGAGCATAAGGTGGTCCCACCAGTAG                           |
| <i>Angptl8-P1.2K-R</i>        | CCCAAGCTTTGACAGTTTCGTGGGTGTGGTT                           |
| <i>Angptl8-P1.0K-F</i>        | CCGCTCGAGAGGGTCTGTCTTTCAGATAC                             |
| <i>Angptl8-P1.0K-R</i>        | CCCAAGCTTTGACAGTTTCGTGGGTGTGGTT                           |
| <i>Angptl8-3UTR-F</i>         | GCTCTAGAGACTACCTGGATGCCACCGAGGAC                          |
| <i>Angptl8-3UTR-R</i>         | ACGCGTCGACTAGATTGCCTCTGTTCTCTT                            |
| <i>Angptl8-delte-LXRE-1-F</i> | ACCGGCCATGTACTGGATCCGC                                    |
| <i>Angptl8-delte-LXRE-1-R</i> | GCCAGGCCTTGCCGGTCAGTGC                                    |
| <i>Angptl8-delte-LXRE-2-F</i> | ACAGAGCCCTGGCGACTGCT                                      |
| <i>Angptl8-delte-LXRE-2-R</i> | GCTGTGCGGATCCAGTACATGG                                    |
| <i>Angptl8-delte-LXRE-3-F</i> | GAAAAGGAGGGGTGGAGGGACGGAGGACCCTTA                         |
| <i>Angptl8-delte-LXRE-3-R</i> | GCTCTTCGTGTACCCACACAGCCTCAATTCAG                          |
| <i>Angptl8-delte-LXRE-4-F</i> | GCCAAAGCTACATAGGGAAATC                                    |
| <i>Angptl8-delte-LXRE-4-R</i> | CTGACTCTCAGCACCCATCTG                                     |
| <i>Angptl8-delte-ngRE-F</i>   | TTATCTATAGGGTCTGTCTTTC                                    |
| <i>Angptl8-delte-ngRE-R</i>   | CCAATAAGGTGGTAGTGTGGG                                     |
| <i>Angptl8-F</i>              | ATAAGAATGCGGCCGCATGGCTGTGCTTGCTCTGCCT                     |
| <i>Angptl8-R</i>              | CGGGATCCGGCTGGGAGGGCTGCTGTGTGGA                           |
| <i>Angptl8-delte-SP-F</i>     | ATAAGAATGCGGCCGCGTCCAGAGCCAGCTCAATATG                     |
| <i>Angptl8-delte-SP-R</i>     | CGGGATCCGGCTGGGAGGGCTGCTGTGTGGA                           |
| <i>Gr-F</i>                   | ATAAGAATGCGGCCGC <sub>ga</sub> ATGGACTCCAAAGAATCCTTAGC    |
| <i>Gr-R</i>                   | GCTCTAGATCATTCTGTATGAAACAGAAGC                            |
| <i>Lxra-F</i>                 | ATAAGAATGCGGCCGC <sub>ga</sub> ATGTCCTTGTGGCTGGAGGCCTCAAT |
| <i>Lxra-R</i>                 | GCTCTAGATCACTCGTGGACATCCCAGATCTCAG                        |

**Table 2. Primers used for qPCR**

|                    |                           |
|--------------------|---------------------------|
| <i>mAngptl8-F</i>  | CACTGTACGGAGACTACAAGTGC   |
| <i>mAngptl8-R</i>  | GTGGCTCTGCTTATCAGCTCG     |
| <i>mAngptl3-F</i>  | CCAGAACACCCAGAAGTAACT     |
| <i>mAngptl3-R</i>  | TCTGTGGGTTCTTGAATACTAGTC  |
| <i>mAngptl4-F</i>  | AAGATGCACAGCATCACAGG      |
| <i>mAngptl4-R</i>  | ATGGATGGGAAATTGGAGC       |
| <i>mGr-F</i>       | AGCTCCCCCTGGTAGAGAC       |
| <i>mGr-R</i>       | GGTGAAGACGCAGAAACCTTG     |
| <i>mNr1d1-F</i>    | TCCCCAAGAGAGAGAAGCAA      |
| <i>mNr1d1-R</i>    | CTGAGAGAAGCCCACCAAAG      |
| <i>mSrebp-1c-F</i> | GGAGCCATGGATTGCACATT      |
| <i>mSrebp-1c-R</i> | GCTTCCAGAGAGGAGCCAG       |
| <i>mFasn-F</i>     | GCTGCGGAAACTTCAGGAAAT     |
| <i>mFasn-R</i>     | AGAGACGTGTCCTCCTGGACTT    |
| <i>mAcc-F</i>      | TGACAGACTGATCGCAGAGAAAG   |
| <i>mAcc-R</i>      | TGGAGAGCCCCACACACA        |
| <i>mTgh-F</i>      | GGAGGGCAGGTGCTCTCA        |
| <i>mTgh-R</i>      | GCCTTCAGCGAGTGGATAGC      |
| <i>mDgat1-F</i>    | GGATCTGAGGTGCCATCGT       |
| <i>mDgat1-R</i>    | CCACCAGGATGCCATACTTG      |
| <i>mDgat2-F</i>    | GGCTACGTTGGCTGGTAACTT     |
| <i>mDgat2-R</i>    | TTCAGGGTGACTGCGTTCTT      |
| <i>mApoCIII-F</i>  | GGCTGGATGGACAATCACTT      |
| <i>mApoCIII-R</i>  | TGGTTGGTCCTCAGGGTTAG      |
| <i>mAbca1-F</i>    | TTGGATGGATTAGATTGGAC      |
| <i>mAbca1-R</i>    | ATGCCTGTGAACACGATG        |
| <i>mFatp2-F</i>    | TCGTGGGACTGGTAGATTTTG     |
| <i>mFatp2-R</i>    | CGCGATGTGTTGAAAGAGTTT     |
| <i>mCd36-F</i>     | GATGACGTGGCAAAGAACAG      |
| <i>mCd36-R</i>     | TCCTCGGGTCTGAGTTAT        |
| <i>mFatp4-qF</i>   | GTGAGATGGCCTCAGCTATC      |
| <i>mFatp4-qR</i>   | GAAGAGGGTCCAGATGCTCT      |
| <i>mAtgl-qF</i>    | CTTCCTCGGGTCTACCACA       |
| <i>mAtgl-qR</i>    | GCCTCCTTGGACACCTCAATAA    |
| <i>mHsl-qF</i>     | TCAACCGACCAGGAGTGCT       |
| <i>mHsl-qR</i>     | CTCGTTGCGTTTGTAGTGCTC     |
| <i>mMgl-qF</i>     | CGGACTTCCAAGTTTTTGTGTCAGA |
| <i>mMgl-qR</i>     | GCAGCCACTAGGATGGAGATG     |
